# Supplementary material for: Synthesis, characterisation and structure–property analysis of derivatives of the non-linear optical material 5-nitro-N-(1-phenylethyl)pyridin-2-amine
Source: Royal Society of Chemistry journal article supplement (doi:10.1039/b008124h), 2001-01-01
Supplement: b008124h.doc [file b008124h.doc]

**Supplementary Information.**

**Synthesis, Characterisation and Structure-Property Analysis of Derivatives of the Non-linear Optical Material 5-Nitro-N-(1-phenylethyl)-2-pyridinamine.**

Philip J. Langley,a Ray T. Bailey,b Frank R. Cruickshankb* Alan R. Kennedy,b Stephen Lochran,b David Pugh,b John N. Sherwood,b Anna Viikki,a and John D. Wallis*c

**Experimental.**

***(S)***-**4-Methyl-5-nitro-N-(1-phenylethyl)-2-pyridinamine 3**

Yellow lumps(91.8 %); m.p. 75-77 C; found: C, 65.2; H, 5.8; N, 16.2 %; C14H15N3O2 requires: C, 65.4; H, 5.9; N, 16.3%; *H:* 8.87 (s, 6-*H*), 7.28 (m, C6*H5*), 6.09 (br.s, N-*H*), 6.06 (s, 3-*H*), 4.90 (m, C*H*Me), 2.48 (d, JMe,3 0.6, 4-C*H3*), 1.59 (d, *J*H,Me 6.6, CHC*H3*); *C*: 159.82 (2-*C*), 148.26 (4-*C*), 145.37 (6-*C*), 143.07 (1-*C*), 137.02 (5-*C*), 128.85 (3-,5-*C*), 127.51 (4-*C*), 125.76 (2-,6-*C*), 107.89 (3-*C*), 51.87 (*C*HMe), 23.72 (CH*C*H3) and 21.67 (4- *C*H3); *max*: 3377, 1614, 1531, 1132, 850, 762 and 702; *m/z* (CI): 258 ([M+H+]), 228 (100%) and 124 ; *[]* *=* -136 (c = 1.0, dichloromethane)

***(S)***-**6-Methyl-5-nitro-N-(1-phenylethyl)-2-pyridinamine 4**

Yellow lumps and some microcrystalline material (89.5 %); m.p. 68-69 C; found: C, 65.0; H, 5.8; N, 16.3%; C14H15N3O2 requires: C, 65.4; H, 5.9; N, 16.3 %; *H*: 8.06 (d, *J*4,3 9.2, 4-*H*), 7.35-7.19 (m, C6*H5*), 6.12 (d, *J*3,4 9.2, 3-*H*), 5.86 (br.d, *J*H,NH 5.5, N-*H*), 4.91 (m, C*H*Me), 2.71 (s, 6-C*H3*) and 1.56 (d, *J*H,Me 6.9, CHC*H3*); *C*: 158.65 & 156.35 (2-,6-*C*), 143.18 (1-*C*), 136.03 & 135.14 (3-,4-*C*), 128.73 (3-,5-*C*), 127.39 (4-*C*), 125.81 (2-,6-*C*), 104.23 (3- *C*), 51.79 (*C*HMe), 25.42 (6- *C*H3) and 23.35 (CH*C*H3); *max*: 3352, 1589, 1080, 822, 767 and 700; *m/z* (CI): 258 ([M+H]+ ,100%) and 228; *[]*  = -132 (c = 1.0, dichloromethane).

***(S)***-**N-Ethyl-5-nitro-N-(1-phenylethyl)-2-pyridinamine 7**

Yellow oil (82.5 %); *H*: 9.08 (d, *J*6,4 2.7, 6-*H*), 8.16 (dd, *J*4,3 9.6 and *J*4,6 2.7, 4-*H*),7.30 (m, C6*H5*), 6.45 (d, J3,4 9.5, *3-*H), 6.35 (m, C*H*Me), 3.34 (m, 10 lines, N-C*H2*), 1.64 (d, *J*H,Me 7.1, CHC*H3*), 1.04 (t, *J* 7.0, CH2C*H3*); *C*: 159.82 (2-*C*), 146.67 (6-*C*), 140.69 (1- *C*), 134.71 & 132.68 (4-,5-*C*), 128.55 (3,5-*C*), 127.51 (4-*C*), 127.15 (2-,6-*C*), 104.72 (3-*C*), 53.46 (*C*HMe), 39.28 (N*C*H2), 16.92 (CH*C*H3), 13.62 (CH2*C*H3; *max* (thin film): 3062, 3028, 2975, 2932, 2875, 1576, 1491, 1320, 1285, 1206, 1162, 1111, 1079, 10047, 1029, 998, 847, 815, 765, 725, 698, 563, 537, 488; *m/z* (EI): 271 (M+), 256 ([M-Me]+), 242 ([M-Et]+), 166 ([M-PhCHMe]+), 105 ([PhCHMe+], 100%) and 77 (Ph+); *HRMS:* 271.1326. C15H17N3O2 requires 271.1321; *[ ]* = +470 (c = 0.2, dichloromethane).

***(S)***-**5-Nitro-N-(1-phenylethyl)-N-propyl-2-pyridinamine 8**

#### Orange oil which solidified slowly (26.3%), m.p. 56-58 oC, *H*: 9.09 (d, J 2.7, 6-*H*), 8.17 (dd, J 9.5, 2.9, 4-*H*), 7.29 (m, C6*H5*), 6.38 (d, J 9.6, 3-*H*), 6.31 (br m, C*H*Me), 3.15 (m, NC*H2*), 1.63 (d, CHC*H3*), 1.46 (m, C*H2*Me), 0.82 (t, J 7.4, CH2C*H3*); *C*: 159.99 (2-*C*), 146.66 (6-*C*), 140.66 (1’-C), 134.65 (5-*C*), 132.65 (4,-*C*), 128.51 (3’-,5’-*C*), 127.49 (4’-*C*), 127.10 (2’-,6’-*C*), 104.71 (3-*C*), 53.33 (*C*HMe), 46.69 (N-*C*H2), 21.33 (*C*H2Me), 16.85 (CH*C*H3), 11.26 (CH2*C*H3); *max* (thin film): 3049, 3029, 2950 , 2931, 1567, 1484, 1419, 1330, 1291, 1207, 1205, 1114, 1068, 1048, 1031, 999, 821, 801,766, 737, 724, 700, 576, 534, 484; *m/z* (CI): 286 ([M+1]+), 256 (100%), 152; *[]* + 264 ( c = 0.1, dichloromethane).

###### Further derivatives of 5-nitro-N-(1-phenylethyl)-2-pyridinamine.

***(S)***-**4-Nitro-N-(1-phenylethyl)-aniline 10**

4-Fluoronitrobenzene (Aldrich, 1.11 g, 7.9 mmol) and (S)--methylbenzylamine (2.61 g, 21.5 mmol) were reacted in DMSO (15 ml) at 50 C as described38 to give **10**(1.72 g, 89.9%), m.p. 66-68 C (lit.49: 68-70 C); found C, 69.6; H, 5.8; N, 11.1 %; Calculated for C14H14N2O2: C, 69.5; H, 5.8; N, 11.5%. *H*: 7.96 (d with fine split., *J* 9.2, 3,5-*H*), 7.25 (m, C6*H5*), 6.45 (d with fine split., *J* 9.2, 2,6-*H*), 5.14 (br.d, *J*5.5, N-*H*), 4.56 (quin., *J* ~ 6.1, C*H*Me) and 1.55 (d, *J* 6.6, C*H3*); *C*: 152.58 (4-*C*), 143.41 (1-*C*), 137.92 (1-*C*), 128.93 (3-,5-*C*), 127.44 (4-*C*), 126.21 (2’-,6’-C), 125.65 (3-,5-*C*), 111.90 (2-,6-*C*), 53.31 (*C*HMe) and 24.41 (*C*H3); *max*: 3402, 3082-3020, 1602, 1107, 839, 752, 696 and 665; *m/z* (CI) 260 ( [M+NH4]+), 243 ([M+H]+), 213 ([M+H - NO]+, 100 %), 156 and 109; *[]* = -109 ( c = 1.0, dichloromethane).

***(S)***-**N-(1-phenylethyl)-2-pyrimidinamine 11.**

A solution of 2-chloropyrimidine (2.28 g, 20 mmol) and (*S*)-(-)--methylbenzylamine (8.0 ml, 60 mmol) in ethanol (10 ml) was refluxed under a nitrogen atmosphere for 8 h. The solvent was removed and the residue partitioned between dichloromethane and aqueous sodium hydroxide (2M). The aqueous layer was extracted again with dichloromethane and the combined organics were washed twice with brine and dried over anhydrous Na2SO4. Purification by flash column chromatography on silica using ethyl acetate/hexane (graded elution; 30% ethyl acetate initially, increasing polarity to 50-60%) gave **11** (3.70g, 93.0%) as a white solid, m.p. 39-40 oC (from ethanol/water). *H*: 8.14 (d, *J* 4.7, 4-,6-*H*), 7.28 (m, C6*H5*), 6.53 (br.m, N*H*), 6.41 (t, *J* 4.7, 5-*H*), 5.22 ( quin, *J* 7.0, C*H*Me), 1.54 (d, *J* 6.9, C*H3*); *H*: 161.74 (4-,6-*C*), 157.82 (2-*C*), 144.59 (1’- *C*), 128.40 (3’-,5’-*C*), 126.80 (4’-*C*), 125.98 (2’-,6’-*C*), 110.37 (5-*C*), 50.33 (*C*HMe), 22.90 (*C*H3); *max*: 3253, 1590, 1530, 1410, 1257, 1209, 1142, 1100, 802, 766, 699, 556, 506; *m/z* (EI) 198 ([M-H]+), 183 [(M-CH4)+, 100%], 120 (PhCHMeNH+), 105 (PhCHMe+), 79, 77; *HRMS:* found 199.1102, C12H13N3 requires 119.1109; *[]* = -63 ( c = 1.0, dichloromethane).

***(R)*-N-(2-Hydroxy-1-phenylethyl)-5-nitro-2-pyridinamine 12**

2-Chloro-5-nitropyridine (2.0 g, 12.6 mmol), (*R*)-2-amino-2-phenylethanol (2.59 g, 18.9 mmol) and triethylamine (2.55 g, 25.2 mmol) were refluxed together in ethanol (40 ml) under nitrogen for 3 days. After removal of solvent, the residue was added to brine, and extracted three times with dichloromethane. The organic layer was dried over sodium sulfate, and the solvent removed. The residue was purified by chromatography on silica eluting with dichloromethane/methanol (99:1 increasing to 9:1) to give the product as a sticky yellow solid which was dried *in vacuo* at 80 oC for 24 h to give a golden glass (3.1 g, 95%) which softened at 43-45 oC; found C: 60.5, H: 5.3, N 16.5%, C13H13N3O3 requires C: 60.2, H: 5.1, N: 16.2%; *H*: 8.91 (d, J4,6 2.5, 6-*H*), 8.08 (dd, J3,4 9.3, J4,6 2.8, 4-*H*), 7.33 (m , C6*H5*), 6.58 (br, C*H*Ph), 6.29 (d, J3,4 9.3, 3-*H*), 4.97 (br, N*H*), 3.97 (AB system, C*H2*OH), 3.22 (br, O-*H*); *C*: 160.9 (2-*C*), 146.5 (6-*C*), 138.4 (1’- *C*), 136.1 & 133.1 (4-,5-*C*), 129.0 (3’-,5’-*C*), 128.2 (4’-*C*), 126.6 (2’-,6’-*C*), 106.4 (3- *C*), 66.5 (*C*H2OH), 58.2 (*C*HPh); *max*: 3350 br, 1606, 1336, 1292; *m/z* (CI): 260 ([M+H]+, 100 %), 230, 140, 110; *[]* = –195 (c = 0.39, methanol).

***(1’S,2’R)*- N-(1’-Hydroxy-1’-phenylprop-2’-yl)-N-methyl-5-nitro-2-pyridinamine 13**

Reaction of (1*R,*2*S)*-(-)-ephedrine (2.31 g, 14 mmol.) and 2-chloro-5-nitropyridine (1.11 g. 7 mmol.) according to the general procedure for **2** gave **13** as a yellow, waxy solid (2.0 g, 98 %); m.p. 100-102 C (dec.); *H*: 8.93 (d, *J*6,4 2.7, 6-H), 8.10 (dd, *J*4,3 9.5 and *J*4,6 2.7, 4-H), 7.34-7.18 (m, C6*H5*), 6.36 (d, *J*3,4 9.5, 3-*H*), 4.98 (m, C*H*Ph), 4.82 (d, *J* 4.0, O-*H*), 4.34 (m, C*H*Me), 2.81 (s, N-C*H3*) and 1.28 (d, *J* 7.0, CHC*H3*); *C*: 160.80 (2-*C*), 145.77 (6-*C*), 141.54 (1-*C*), 134.75 and 132.74 (4-,5-*C*), 128.13 (3-,5-*C*), 127.62 (4-*C*), 126.15 (2-,6-*C*), 105.01 (3-*C*), 76.82 (*C*-OH), 58.23 (*C*HMe), 33.04 (N- *C*H3) and 12.81 (CH*C*H3); *max*: 3527, 1595, 1120, 812, 758 and 702;. *m/z* (EI) 287 (M+), 180 ([M – PhCHOH]+, 100 %), 134 and 100; *[]* = 275 ( c = 0.5, dichloromethane).

***(S)***-**5-Nitro-N-(1-phenylethyl)-2-pyridinamine-1-oxide 14**

*m*-Chloroperoxybenzoic acid (Aldrich, 57-86 % purity, 3.1 g) was added in one portion to a stirred solution of **1** (2.0 g, 8.2 mmol) in AR grade chloroform (60 ml) at 20 oC and the solution stirred for 40 min. The reaction was poured directly onto a chromatography column consisting of *neutral* alumina with a head of *basic* alumina to promote decomposition of residual peracid, and eluted with chloroform/methanol (graded elution, 0 % to 10% methanol). Removal of solvent and drying *in vacuo* at 65 C over P2O5 gave **14** (1.80 g, 84.4 %) as a glassy solid, m.p. 40-42 C; found: C, 58.3; H, 5.7; N, 15.5 %. C13H13N3O 3.0.5H2O requires: C, 58.2; H, 5.3; N, 15.7 % *H*: 9.06 (d, *J*6,4 2.5, 6-*H*), 8.18 (br.d, *J* 6.3, N-*H*), 7.86 (dd, *J*4,3 9.3 and *J*4,6 2.5, 4-*H*), 7.29 (m, C6*H5*), 6.45 (d, *J*3,4 9.3, 3-*H*), 4.75 (overlapping dq, 5 lines, *J* 6.9, 6.3, C*H*Me) and 1.72 (d, *J* 6.9, C*H3*); *C*: 152.75 (2-*C*), 141.50 (1-*C*), 134.32 (5-*C*), 133.90 (4-*C*), 129.08 (3-,5-*C*), 127.96 (4- *C*), 125.51 (2-,6-*C*), 123.42 (6-*C*), 104.04 (3-*C*), 53.07 (*C*HMe) and 24.01 (*C*H3); *max*. : 1625, 1574, 1336, 1268, 1194, 1142, 1079, 954, 810, 727, 687;*m/z* (CI): 277 ([M+NH4]+) 260 ([M+1]+), 244 ([M+H-O]+, 100 %) and 214; *HRMS:* found 259.0954, C13H13N3O3 requires 259.0957; *[]*  = +121 (c = 1.0, dichloromethane). Over several months, the material partly converted to a powdery solid, m.p. 58-60 oC.
